# Supplementary material for: Ultrabright dye-loaded spherical polyelectrolyte brushes and their fundamental structure-fluorescence tuning principles
Source: Royal Society of Chemistry journal article supplement (doi:10.1039/c9nr02168j), 2019-01-01
Supplement: c9nr02168j1.pdf [file c9nr02168j1.pdf]

## Electronic supplementary information

### Ultrabright dye-loaded spherical polyelectrolyte brushes and their fundamental structure-fluorescence tuning principles

*Hajar Masoomi, Yao Wang\*, Xiaoxia Fang, Peirui Wang, Cang Chen, Kai  
Liu, Hongchen Gu, and Hong Xu\**

School of Biomedical Engineering, Shanghai Jiao Tong University, Shanghai 200030,  
China

#### Corresponding Author

\* E-mail: wangyao@sjtu.edu.cn (Y.W.); xuhong@sjtu.edu.cn (H.X.).

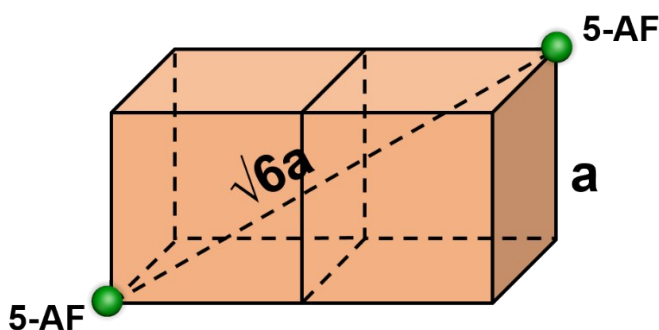

**Figure S1.** Hypothesized model of two adjacent immobilized 5-AF molecules on brushes.

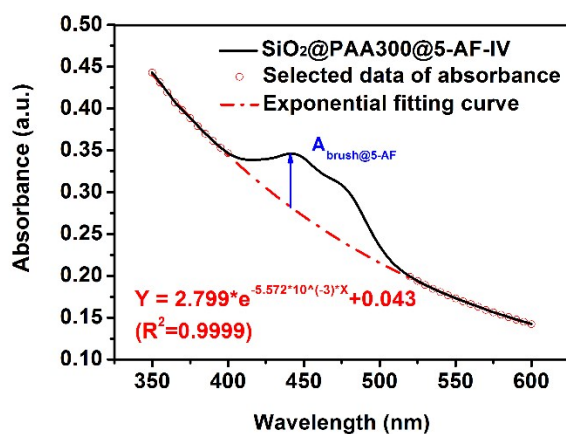

**Figure S2.** UV-vis spectrum of SiO<sub>2</sub>@PAA300@5-AF-IV measured in water (black solid line). The scattering background of brush particle is identified by exponential fitting curve (red dash line) using data of absorbance measured at selected wavelengths (red circle points).

### Calculations of QY:

For UV-vis measurement, when  $\lambda = 430$  nm,

$$\text{absorbance}_{\text{R6G}} = 0.036,$$

$$\text{absorbance}_{5\text{-AF}} = 0.029,$$

$$\text{corrective absorbance}_{\text{SiO}_2@\text{PAA300}@5\text{-AF-IV}} = \text{absorbance}_{\text{SiO}_2@\text{PAA300}@5\text{-AF-IV}} -$$

$$\text{absorbance}_{\text{fitting}} = 0.341 - 0.298 = 0.043$$

For fluorescence measurement, when  $\lambda_{\text{excitation}} = 430$  nm,

$$\text{emission integral}_{\text{R6G}} = 8728.750,$$

$$\text{emission integral}_{5\text{-AF}} = 84.734,$$

$$\text{emission integral}_{\text{SiO}_2@\text{PAA300}@5\text{-AF-IV}} = 2136.854$$

$$\text{QY}_{5\text{-AF}} = \text{QY}_{\text{R6G}} \times \text{absorbance}_{\text{R6G}} / \text{absorbance}_{5\text{-AF}}$$

$$\times \text{emission integral}_{5\text{-AF}} / \text{emission integral}_{\text{R6G}}$$

$$\times \text{refraction index}_{\text{H}_2\text{O}}^2 / \text{refraction index}_{\text{C}_2\text{H}_5\text{OH}}^2$$

$$= 0.95 \times 0.036 / 0.029 \times 84.734 / 8728.750 \times 1.33^2 / 1.37^2$$

$$= 0.011$$

$$\begin{aligned}
QY_{\text{SiO}_2@\text{PAA300}@5\text{-AF-IV}} &= QY_{\text{R6G}} \times \text{absorbance}_{\text{R6G}}/\text{corrective absorbance}_{\text{SiO}_2@\text{PAA300}@5\text{-AF-IV}} \\
&\quad \times \text{emission integral}_{\text{SiO}_2@\text{PAA300}@5\text{-AF-IV}}/\text{emission integral}_{\text{R6G}} \\
&\quad \times \text{refraction index}_{\text{H}_2\text{O}}^2/\text{refraction index}_{\text{C}_2\text{H}_5\text{OH}}^2 \\
&= 0.95 \times 0.036/0.043 \times 2136.854/8728.750 \times 1.33^2/1.37^2 \\
&= 0.184
\end{aligned}$$

### Calculations of brightness:

$$\begin{aligned}
&\text{Number of 5-AF molecules on per SiO}_2@\text{PAA300}@5\text{-AF-IV} \\
&= (\text{loading amount of 5-AF on 1 mg brush}) / (\text{particle number of 1 mg brush}) \\
&= (0.062 \pm 0.003 \mu\text{mol/mg brush} \times N_A \times 1 \text{ mg}) / ((1.505 \pm 0.213) \times 10^{11}) \\
&= ((0.062 \pm 0.003) \times 10^{-6} \text{ mol/mg brush} \times 6.02 \times 10^{23}/\text{mol} \times 1 \text{ mg}) / ((1.505 \pm 0.213) \times 10^{11}) \\
&= (2.48 \pm 0.37) \times 10^5
\end{aligned}$$

$$\begin{aligned}
&\text{According to the QY results, a 5-AF molecule brightness on SiO}_2@\text{PAA300}@5\text{-AF-IV} \\
&= QY_{5\text{-AF on brush}} / QY_{\text{R6G}} \times \text{a R6G molecule brightness} \\
&= (0.180 \pm 0.021)/0.95 \times \text{a R6G molecule brightness} \\
&= (0.189 \pm 0.022) \times \text{a R6G molecule brightness}
\end{aligned}$$

Therefore,  $(2.48 \pm 0.37) \times 10^5$  5-AF molecules on per  $\text{SiO}_2@\text{PAA300}@5\text{-AF-IV}$  is equal to the brightness of  $(2.48 \pm 0.37) \times 10^5 \times (0.189 \pm 0.022) = (4.70 \pm 0.89) \times 10^4$  molecules of R6G.

As the brightness of a single CdSe/ZnS QD is equal to 20 times brightness of a single R6G molecule according to related references,<sup>1-4</sup> then a fluorescent brush particle of  $\text{SiO}_2@\text{PAA300}@5\text{-AF-IV}$  is calculated to be  $(4.70 \pm 0.89) \times 10^4 / 20 = \mathbf{2350 \pm 445}$  times brighter than a single QD.

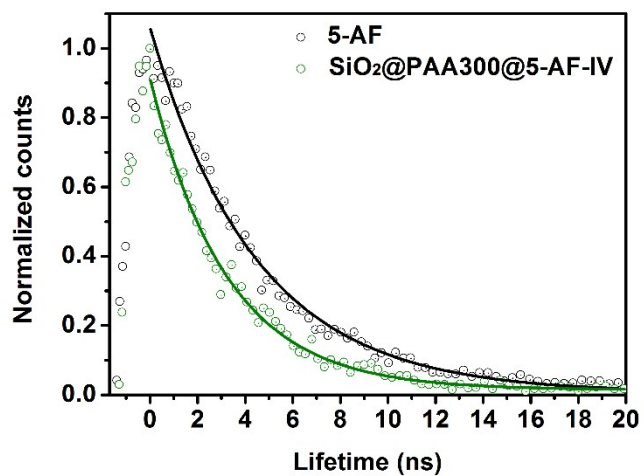

**Figure S3.** Fluorescent lifetime curves of 5-AF and SiO<sub>2</sub>@PAA300@5-AF-IV.

#### References

- 1 E. B. Cho, D. O. Volkov and I. Sokolov, *small*, 2010, **6**, 2314-2319.
- 2 I. L. Medintz, H. T. Uyeda, E. R. Goldman and H. Mattoussi, *Nature materials*, 2005, **4**, 435.
- 3 W. C. Chan, D. J. Maxwell, X. Gao, R. E. Bailey, M. Han and S. Nie, *Current opinion in biotechnology*, 2002, **13**, 40-46.S4
- 4 W. C. Chan and S. Nie, *Science*, 1998, **281**, 2016-2018.
